# Supplementary material
Source: MDPI journal article supplement (https://www.mdpi.com/2624-599X/5/1/6)
Supplement: s1 [file s1]

# Supplementary Materials

## GIS Based Road Traffic Noise Mapping and Assessment of Health Hazards for a Developing Urban Intersection

Md Iltaf Zafar 1,†, Rakesh Dubey 1,†, Shruti Bharadwaj1, Anubhav Srivastava1, Saurabh Kr Tiwary1 and Susham Biswas 1,\*

1 Geoinformatics Lab, Department of Computer Science and Engineering, Rajiv Gandhi Institute of Petroleum Technology, Amethi 229304, India; pgi15001@rgipt.ac.in (M.I.Z.); pgi19001@rgipt.ac.in (R.D.); pgi17001@rgipt.ac.in (S.B.);

\* Correspondence: susham@rgipt.ac.in; Tel.: +91-6388415537

† These authors contributed equally to this work.

### Introduction:

Studies on environmental noise have shown that the fraction of the population living in noisy areas, such as around airports and on noisy streets, have an increased risk for hypertension and cardiovascular problems[1]. Cardiovascular effects are associated with long-term exposure of noise at high LAeq,24h values in the range of 65–70 dB or more, for both air- and road-traffic noises [2,3]. Hearing impairment is typically defined as a restriction in the threshold of hearing and is assessed by the range of audiometer. The ISO Standard 1999 (ISO 1990) recommends a method for calculating noise-induced hearing impairment in populations exposed to all types of noise (continuous, intermittent, impulse) during working hours[4]. Noise exposure is characterized by LAeq over 8 hours (LAeq,8h). Thus, the authors have attempted to determine the noise exposure and relate it to the associated health hazards for the road intersections.

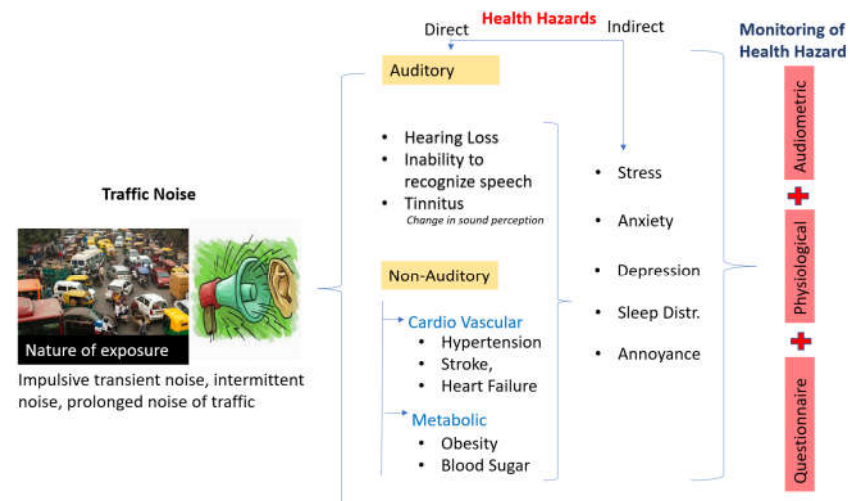

Figure S1: Noise Exposure, it's Health Hazard and Monitoring

In several countries, noise-induced hearing loss (NIHL) is also the most common occupational ailment. From 2012 to 2016, NIHL was the most frequently recognized occupational condition in Finland[5]. NIHL is the most often recognised occupational condition in Germany, accounting for 38.3 percent (n = 6951) of all recognised occupational diseases in 2019. In a study of 5 nations, including France, Spain, Italy, Germany, and Denmark, it was

discovered that NIHL was recognised as an occupational disease from 6 incidences per 100,000 people in France to 33 cases per 100,000 in Denmark. As a result, creating a healthy environment for huge numbers of people requires an awareness and recognition of the health implications of noise exposure.

It is found by recent World Health Organization (WHO) reviews of environmental noise that increased psychosocial and cardiovascular risks related to traffic noise levels varying from about forty to eighty dB(A) and a growing body of research suggests that noise exposure led to the increment in the cardiovascular disease risk [6–8]. Hearing loss, on the other hand, is the most well-studied and well-understood health effect of workplace noise (Figure 1).

As per the World Health Organization, debilitating hearing loss affects roughly 30 percent of all adults over the age of 65, with most of them residing in low- and middle-income nations. Congenital defects, accidents, utilisation of ototoxic medicine, and access to ecological noise can all cause hearing loss [9], but occupational exposure to noise is found to be the most frequent source of NIHL.

*Occupational Health Hazards:* Occupational noise-induced hearing loss is now a globally recognised work-related condition. This is the most common work-related illness in the world, impacting >10 percent of all workers in developed nations [10]. So over previous 26 years, a comprehensive evaluation from China found a proportion of 21.3 percent for occupational NIHL in Chinese employees who are exposed to noise [11]. A comparable statistic was calculated for workers in the United States: between 1981 and 2010, the hearing loss frequency among noise-exposed jobs was around 20 percent. For most industry sites across the United States, though, there has been a slow but continuous decline in the noise-induced hearing loss incidence [12]. As per a WHO research, industrial exposure to noise is responsible for roughly 16 percent of debilitating hearing loss in adults globally, with the global burden of illness resulting from occupational NIHL estimated at over 4.1 million disability-adjusted years of life loss (DALY) in 2005. Nevertheless, this figure likely understates the occupational noise worldwide impact. It only includes NIHL-related burden; other health-related effects of occupational exposure to noise, such as hyperacusis or tinnitus, are not included [13–15]. Occupational NIHL is also becoming more prevalent. According to Zhou et al. [16], the health burden associated with occupational NIHL grew from 3.3 to 6 million DALYs between 1990 and 2017, with low-income nations bearing the brunt of the burden. Actual DALY data from the Institute for Health Metrics Evaluation (IHME) suggest that the burden is escalating the greatest in the Western Pacific WHO Region (which includes, for example, China, Japan, South Korea, Philippines, Australia, and New Zealand), whilst staying reasonably constant elsewhere.

In the recent six years, 5 systematic reviews on occupational NIHL have been published [10,17]. One article concentrates on asymmetric hearing loss, another on hearing loss in China [18], while the remaining three papers looked at occupational NIHL in total. [15,19,20].

A thorough analysis of occupational NIHL was undertaken by Lie et al., which included a critical evaluation of 187 papers. Despite the fact that differing criteria for defining occupational NIHL made worldwide comparisons difficult, it was discovered by the authors that occupational noise is responsible for 7 to 21 percent of hearing loss. Workers in industry, shipbuilding, construction, the

military, and farming were shown to be at higher risk of occupational NIHL. Kindergarten employees were not shown to be at a higher risk, while study on professional musicians was ambiguous. In addition, exposure to impulse noise is more harmful than continuous noise, and solvents and second-hand smoke may raise the risk of NIHL, according to the research. Mazitova et al. [21] synthesised 5 reviews (counting Lie et al.) and two original investigations [22], all of which reached identical conclusions. Chen et al. [52] reviewed 108 studies published between 2000 and 2020 on the epidemiology, pathogenesis, and NIHL prevention, attempting to find that the raw presence of occupational NIHL usually ranges from 11.2 percent in a group of South African gold miners[38] to 58 percent in a group of construction workers in the United States (average age = 59.2 years) [13].

88 papers were analysed by Zhou et al.[24] on occupational NIHL in Chinese workers and discovered that workers in manufacturing, transportation, mining, and agriculture were exposed to hazardous noise levels of 98.6+/- 7.2 dB on average. Masterson et al. [25] studied the aetiology of asymmetrical hearing loss in depth. The occupational origin of asymmetrical hearing loss is also questioned because occupational NIHL is typically symmetrical. Six studies were included in this evaluation, with limited evidence of a link between occupational noise and asymmetrical hearing loss. According to the authors, physiological differences between ears or unequal shielding of one ear could make one ear more vulnerable.

Table S1. Sample Data for Leq Noise Levels

| ID | X         | Y         | LEQ (dB) |
|----|-----------|-----------|----------|
| 1  | 81.519859 | 26.266251 | 101.6    |
| 2  | 81.519995 | 26.26623  | 106.3    |
| 3  | 81.520291 | 26.266185 | 107.2    |
| 4  | 81.520499 | 26.26615  | 102.9    |
| 5  | 81.520629 | 26.266303 | 99       |
| 6  | 81.520816 | 26.266462 | 91.7     |
| 7  | 81.520645 | 26.266133 | 102.8    |
| 8  | 81.521319 | 26.266025 | 96.9     |
| 9  | 81.521544 | 26.265932 | 96.9     |
| 10 | 81.521092 | 26.266003 | 107      |
| 11 | 81.520816 | 26.266064 | 107      |
| 12 | 81.520371 | 26.265706 | 93.8     |
| 13 | 81.520398 | 26.26601  | 98.3     |
| 14 | 81.520395 | 26.266127 | 102.9    |
| 15 | 81.52021  | 26.266162 | 107.2    |
| 25 | 81.520626 | 26.266453 | 43       |
| 26 | 81.521035 | 26.266473 | 43       |
| 27 | 81.520926 | 26.26621  | 46       |
| 28 | 81.521206 | 26.26617  | 56       |
| 29 | 81.521432 | 26.26645  | 43       |
| 30 | 81.520652 | 26.265865 | 43       |
| 31 | 81.520781 | 26.265608 | 47       |
| 32 | 81.520923 | 26.265854 | 47       |
| 33 | 81.52104  | 26.265668 | 43       |
| 34 | 81.521457 | 26.265728 | 58       |

Table S2. Difference of long-duration vs. short duration noise data in prediction

| ID | X        | Y        | M1L      | M2L      | M3L      | M4L      | M5L      | LEQ      | LM1      | LM2      | LM3      | LM4      | LM5      |
|----|----------|----------|----------|----------|----------|----------|----------|----------|----------|----------|----------|----------|----------|
| 1  | 81.51986 | 26.26625 | 81.8     | 99.8     | 84       | 93.3     | 91.6     | 101.6    | 19.8     | 1.8      | 17.6     | 8.3      | 10       |
| 2  | 81.52    | 26.26623 | 81.8     | 99.8     | 84       | 93.3     | 91.6     | 106.3    | 24.5     | 6.5      | 22.3     | 13       | 14.7     |
| 3  | 81.52029 | 26.26619 | 96.4     | 99.9     | 84       | 81.6     | 98.4     | 107.2    | 10.8     | 7.3      | 23.2     | 25.6     | 8.8      |
| 4  | 81.5205  | 26.26615 | 96.4     | 82.9     | 96.5     | 75.6     | 98.6     | 102.9    | 6.5      | 20       | 6.4      | 27.3     | 4.3      |
| 5  | 81.52063 | 26.2663  | 98.4     | 82.9     | 96.5     | 84.9     | 96.1     | 99       | 0.6      | 16.1     | 2.5      | 14.1     | 2.9      |
| 6  | 81.52082 | 26.26646 | 95.7     | 84.3     | 99.4     | 80.6     | 84       | 91.7     | -4       | 7.4      | -7.7     | 11.1     | 7.7      |
| 7  | 81.52065 | 26.26613 | 88.9     | 95.4     | 82.4     | 81.3     | 97       | 102.8    | 13.9     | 7.4      | 20.4     | 21.5     | 5.8      |
| 8  | 81.52132 | 26.26603 | 98.4     | 93.7     | 90.4     | 79.5     | 98.8     | 96.9     | -1.5     | 3.2      | 6.5      | 17.4     | -1.9     |
| 9  | 81.52154 | 26.26593 | 97.4     | 97.3     | 83       | 80.5     | 102.5    | 96.9     | -0.5     | -0.4     | 13.9     | 16.4     | -5.6     |
| 10 | 81.52109 | 26.266   | 83.7     | 98.8     | 78.8     | 97.5     | 99       | 107      | 23.3     | 8.2      | 28.2     | 9.5      | 8        |
| 11 | 81.52082 | 26.26606 | 96.7     | 84       | 96.4     | 88.4     | 95.6     | 107      | 10.3     | 23       | 10.6     | 18.6     | 11.4     |
| 12 | 81.52037 | 26.26571 | 96.7     | 84       | 96.4     | 88       | 95.6     | 93.8     | -2.9     | 9.8      | -2.6     | 5.8      | -1.8     |
| 13 | 81.5204  | 26.26601 | 80.9     | 85       | 75       | 82       | 76.7     | 98.3     | 17.4     | 13.3     | 23.3     | 16.3     | 21.6     |
| 14 | 81.5204  | 26.26613 | 92.5     | 75       | 83.6     | 89.3     | 81.8     | 102.9    | 10.4     | 27.9     | 19.3     | 13.6     | 21.1     |
| 15 | 81.52021 | 26.26616 | 80.6     | 92.9     | 88.5     | 103.6    | 107.6    | 107.2    | 26.6     | 14.3     | 18.7     | 3.6      | -0.4     |
| 16 | 81.52004 | 26.26619 | 80.6     | 92.9     | 88.5     | 92       | 107.6    | 106.3    | 25.7     | 13.4     | 17.8     | 14.3     | -1.3     |
| 17 | 81.51988 | 26.26621 | 81.1     | 106.2    | 87.2     | 89.8     | 77.9     | 101.6    | 20.5     | -4.6     | 14.4     | 11.8     | 23.7     |
| 18 | 81.51968 | 26.26623 | 81.1     | 93       | 86.5     | 85.6     | 77.9     | 101.6    | 20.5     | 8.6      | 15.1     | 16       | 23.7     |
| 19 | 81.51984 | 26.26604 | 45.45961 | 69.11121 | 50.51029 | 52.93277 | 43.43191 | 69.11654 | 23.65693 | 0.005326 | 18.60625 | 16.18378 | 25.68463 |

|    |          |          |          |          |          |          |          |          |          |          |          |          |          |
|----|----------|----------|----------|----------|----------|----------|----------|----------|----------|----------|----------|----------|----------|
| 20 | 81.52018 | 26.26606 | 48.82429 | 60.55245 | 56.21902 | 71.21732 | 75.21535 | 60.59053 | 11.76623 | 0.038074 | 4.371502 | -10.6268 | -14.6248 |
| 21 | 81.52001 | 26.2659  | 40.00265 | 40.04475 | 40.0163  | 40.03641 | 41.15835 | 43.03273 | 3.030085 | 2.987982 | 3.016432 | 2.996323 | 1.874381 |
| 22 | 81.52007 | 26.26638 | 40.01565 | 40.89095 | 40.02593 | 40.21593 | 40.14716 | 43.47858 | 3.462936 | 2.587633 | 3.452648 | 3.262648 | 3.331424 |
| 23 | 81.52035 | 26.26651 | 40.07528 | 40.16677 | 40.00437 | 40.00251 | 40.11872 | 43.09448 | 3.019199 | 2.927717 | 3.090116 | 3.091969 | 2.975764 |
| 24 | 81.52051 | 26.26638 | 64.45589 | 49.46198 | 62.56442 | 51.27667 | 62.16674 | 49.92767 | -14.5282 | 0.465687 | -12.6368 | -1.349   | -12.2391 |
| 25 | 81.52063 | 26.26645 | 40.20163 | 40.01493 | 40.45871 | 40.00637 | 40.01393 | 43.01777 | 2.816141 | 3.002844 | 2.559064 | 3.011396 | 3.003838 |
| 26 | 81.52104 | 26.26647 | 40.21684 | 40.01608 | 40.49224 | 40.00687 | 40.01501 | 43.01835 | 2.801507 | 3.002269 | 2.526102 | 3.011481 | 3.00334  |
| 27 | 81.52093 | 26.26621 | 57.47884 | 45.9677  | 57.18439 | 49.60438 | 56.40115 | 46.94743 | -10.5314 | 0.979732 | -10.237  | -2.65695 | -9.45372 |
| 28 | 81.52121 | 26.26617 | 60.60138 | 55.97454 | 52.79765 | 43.92115 | 60.99805 | 56.08291 | -4.51847 | 0.108368 | 3.285259 | 12.16175 | -4.91514 |
| 29 | 81.52143 | 26.26645 | 40.05871 | 40.01998 | 40.00936 | 40.00076 | 40.06433 | 43.0203  | 2.961594 | 3.00032  | 3.010945 | 3.019541 | 2.955972 |
| 30 | 81.52065 | 26.26587 | 40.14535 | 40.00793 | 40.1358  | 40.02181 | 40.11324 | 43.01427 | 2.868921 | 3.006337 | 2.878472 | 2.99246  | 2.901022 |
| 31 | 81.52078 | 26.26561 | 57.60447 | 46.06357 | 57.30986 | 49.36291 | 56.52615 | 47.02411 | -10.5804 | 0.960539 | -10.2857 | -2.3388  | -9.50204 |
| 32 | 81.52092 | 26.26585 | 58.78396 | 46.99411 | 58.48807 | 50.80299 | 57.70049 | 47.78519 | -10.9988 | 0.791077 | -10.7029 | -3.0178  | -9.9153  |
| 33 | 81.52104 | 26.26567 | 40.00849 | 40.2666  | 40.00275 | 40.19918 | 40.27877 | 43.14564 | 3.137155 | 2.879047 | 3.142895 | 2.946459 | 2.866878 |
| 34 | 81.52146 | 26.26573 | 58.92806 | 58.82935 | 45.79823 | 44.10735 | 63.98948 | 58.88585 | -0.04221 | 0.056496 | 13.08762 | 14.7785  | -5.10363 |

Table S3. Noise exposure value in one cycle of journey for visitor to noisy intersection

| Point name | Noise at 1 <sup>st</sup> point | Noise at 2 <sup>nd</sup> point | Average noise | Noise exposure at point |
|------------|--------------------------------|--------------------------------|---------------|-------------------------|
| a(1-2)     | 91.6                           | 77.9                           | 84.75         | 64.9                    |
| b(2-3)     | 77.9                           | 98.4                           | 88.15         | 68.3                    |
| c(3-4)     | 98.4                           | 77.9                           | 88.15         | 68.3                    |
| d(4-5)     | 77.9                           | 107.6                          | 92.75         | 72.9                    |
| e(5-6)     | 107.6                          | 98.6                           | 103.1         | 83.3                    |
| f(6-7)     | 98.6                           | 107.6                          | 103.1         | 83.3                    |
| g(7-8)     | 107.6                          | 96.1                           | 101.85        | 82                      |
| h(8-9)     | 96.1                           | 98.8                           | 97.45         | 77.6                    |
| i(9-10)    | 98.8                           | 95.6                           | 97.2          | 77.4                    |
| j(10-11)   | 95.6                           | 95.6                           | 95.6          | 75.8                    |
| k(11-12)   | 95.6                           | 102.5                          | 99.05         | 79.2                    |
| l(12-13)   | 102.5                          | 99                             | 100.75        | 80.9                    |
| m(13-14)   | 96.1                           | 84                             | 90.05         | 70.2                    |
| n(14-15)   | 84                             | 97                             | 90.5          | 70.2                    |
| o(15-16)   | 96.1                           | 81.8                           | 88.95         | 69.1                    |
| p(16-17)   | 81.8                           | 76.7                           | 79.25         | 59.4                    |

**Total Noise exposure for 1 hours 30 minutes**

90 dB

Questionnaire of workplace activities occurring.

Table S4. Questionnaire for Health Hazard determination

|                                                                                                                               |  |
|-------------------------------------------------------------------------------------------------------------------------------|--|
| Name                                                                                                                          |  |
| Age                                                                                                                           |  |
| Gender                                                                                                                        |  |
| Built (approximate height/weight)                                                                                             |  |
| Occupation                                                                                                                    |  |
| Address (residence/workplace)                                                                                                 |  |
| Distance of residence and workplace from centre of road)                                                                      |  |
| Duration of stay at workplace                                                                                                 |  |
| Duration of stay at residence                                                                                                 |  |
| (Any change in residence time in week days and weekends)                                                                      |  |
| For how many years working in roadside shops                                                                                  |  |
| Does he/she speaks loudly (check with noise capture)                                                                          |  |
| Does he/she face difficulty in hearing (observe listening to alertness) check with noise capture                              |  |
| When do you go to bed and when do you get up (try to estimate any sleeping disturbance)                                       |  |
| Observe general work pressure/tension in life                                                                                 |  |
| Does he/she show any irritation/restlessness (nature of personality---calm/quite/poised/head shaking/ frequent hand gestures/ |  |
| Do you have any cardio-vascular illness Measure BP and Pulse rate                                                             |  |
| Family health report: age of parent, where do they live, do your family have any disease                                      |  |
| When do you prefer working, i.e., at high or low traffic or crowd                                                             |  |
| Do you prefer attending phone call/radio/TV at loud volume or low volume                                                      |  |
| Do you have any hearing ailment (does he/she hears in both the ear equally)                                                   |  |

Table S5. Noise exposure value for 8 hrs.

| <u>Location</u> | <u>X</u> | <u>Y</u> | <u>Noise Exposure in dB (8 hrs)</u> |
|-----------------|----------|----------|-------------------------------------|
| 1               | 81.51986 | 26.26625 | 93                                  |
| 2               | 81.52    | 26.26623 | 93                                  |
| 3               | 81.52029 | 26.26619 | 96                                  |
| 4               | 81.5205  | 26.26615 | 96                                  |
| 5               | 81.52063 | 26.2663  | 97                                  |
| 6               | 81.52082 | 26.26646 | 96                                  |
| 7               | 81.52065 | 26.26613 | 92                                  |
| 8               | 81.52132 | 26.26603 | 97                                  |
| 9               | 81.52154 | 26.26593 | 98                                  |
| 10              | 81.52109 | 26.266   | 94                                  |
| 11              | 81.52082 | 26.26606 | 96                                  |
| 12              | 81.52037 | 26.26571 | 96                                  |
| 13              | 81.5204  | 26.26601 | 81                                  |
| 14              | 81.5204  | 26.26613 | 90                                  |
| 15              | 81.52021 | 26.26616 | 98                                  |
| 16              | 81.52004 | 26.26619 | 98                                  |
| 17              | 81.51988 | 26.26621 | 97                                  |
| 18              | 81.51968 | 26.26623 | 87                                  |
| 19              | 81.51984 | 26.26604 | 69                                  |
| 20              | 81.52018 | 26.26606 | 60                                  |
| 21              | 81.52001 | 26.2659  | 28                                  |
| 22              | 81.52007 | 26.26638 | 28                                  |
| 23              | 81.52035 | 26.26651 | 43                                  |
| 24              | 81.52051 | 26.26638 | 49                                  |
| 25              | 81.52063 | 26.26645 | 36                                  |
| 26              | 81.52104 | 26.26647 | 43                                  |
| 27              | 81.52093 | 26.26621 | 44                                  |
| 28              | 81.52121 | 26.26617 | 56                                  |
| 29              | 81.52143 | 26.26645 | 28                                  |
| 30              | 81.52065 | 26.26587 | 43                                  |
| 31              | 81.52078 | 26.26561 | 36                                  |
| 32              | 81.52092 | 26.26585 | 47                                  |
| 33              | 81.52104 | 26.26567 | 43                                  |
| 34              | 81.52146 | 26.26573 | 58                                  |

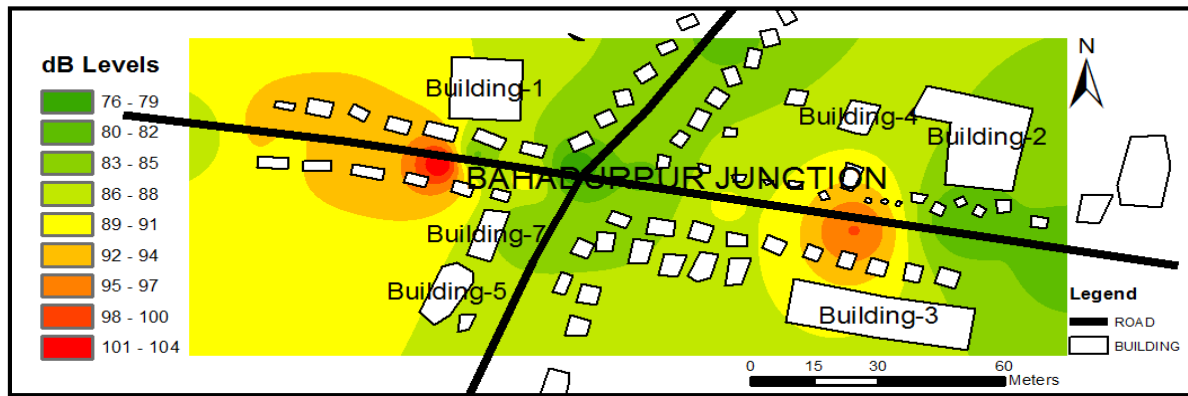

Figure: S2 Noise level mapping in a round trip at noisy crossing at 9-10.30 AM

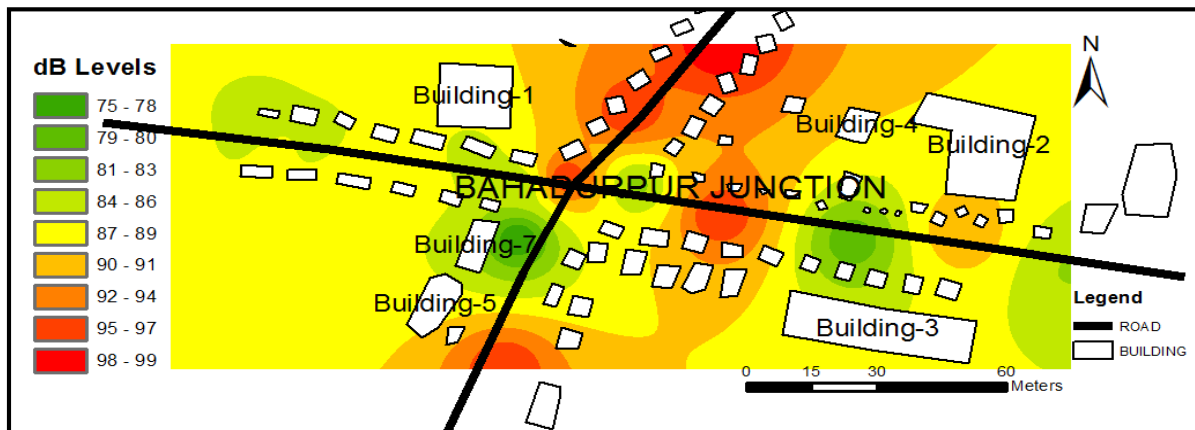

Figure: S3 Noise level mapping in a round trip at noisy crossing at 1-2.30 PM

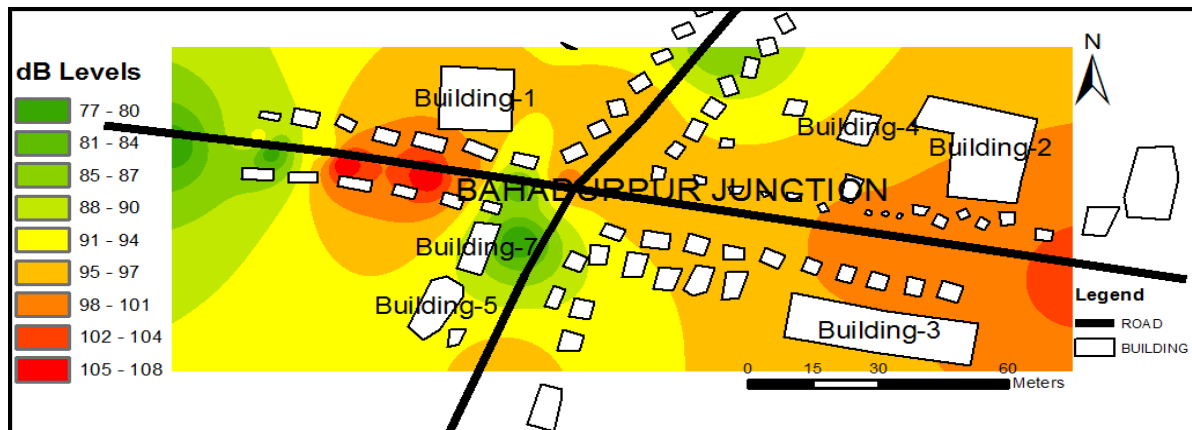

Figure: S4 Noise level mapping in a round trip at noisy crossing at 5-6.30 PM



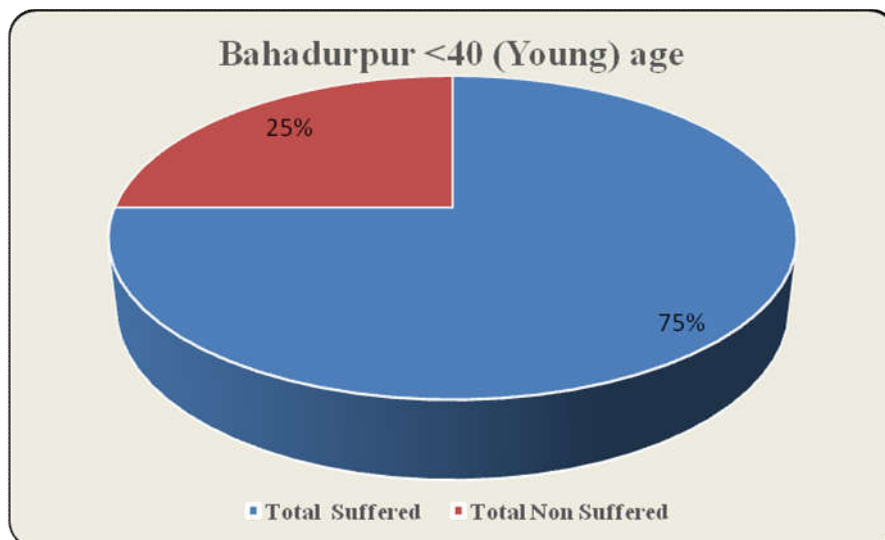

Figure S5 .Total suffering and not suffering people percentage for Bahadurpur area for <40 age group

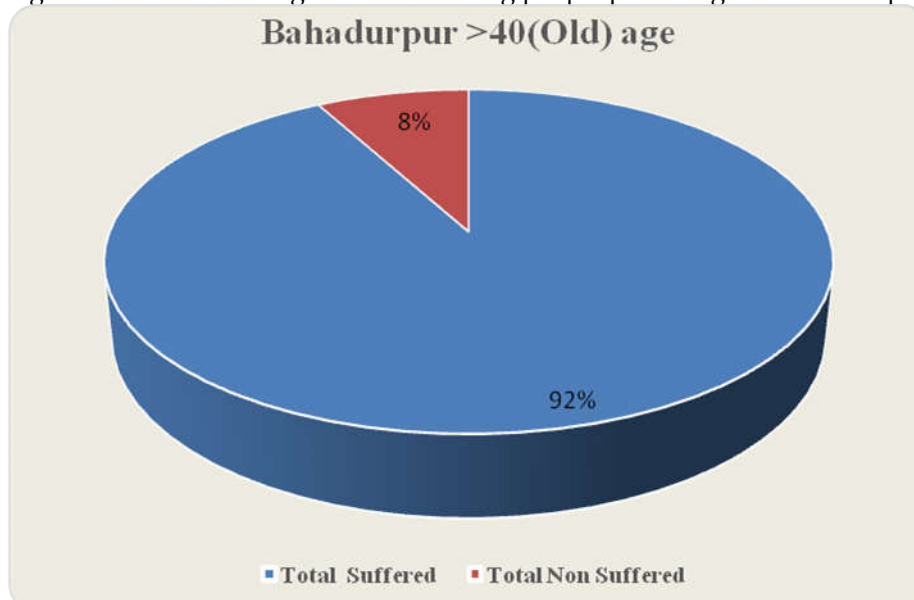

Figure S6.Total suffering and not suffering people percentage for Bahadurpur area for >40 age group

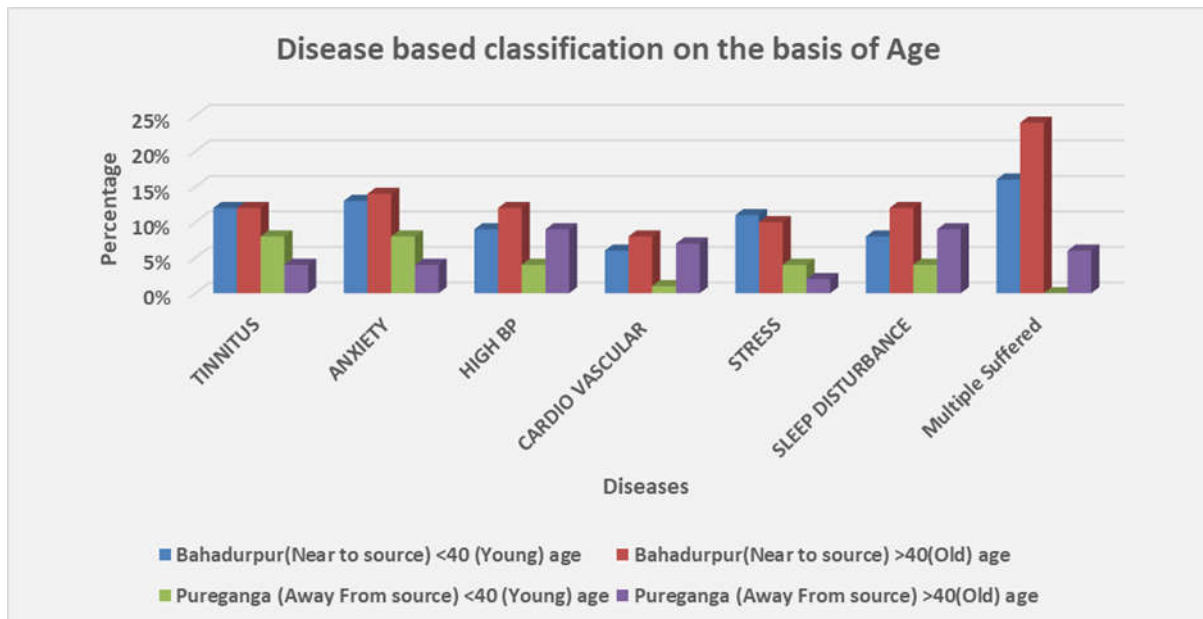

Figure S7 .Comparison of percentages of different ailments for Bahadurpur and Pureganga areas in different age groups

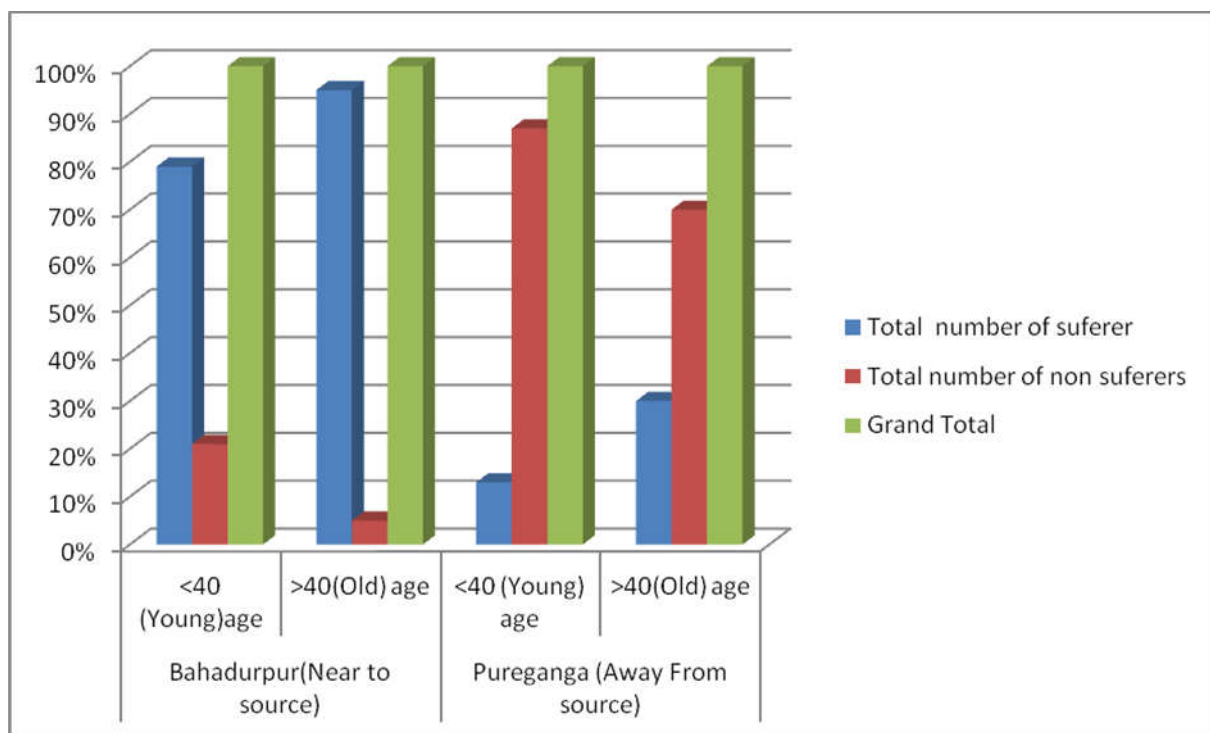

Figure S8..Comparison of percentages of different hearing impairments for Bahadurpur and Pureganga areas in different age groups

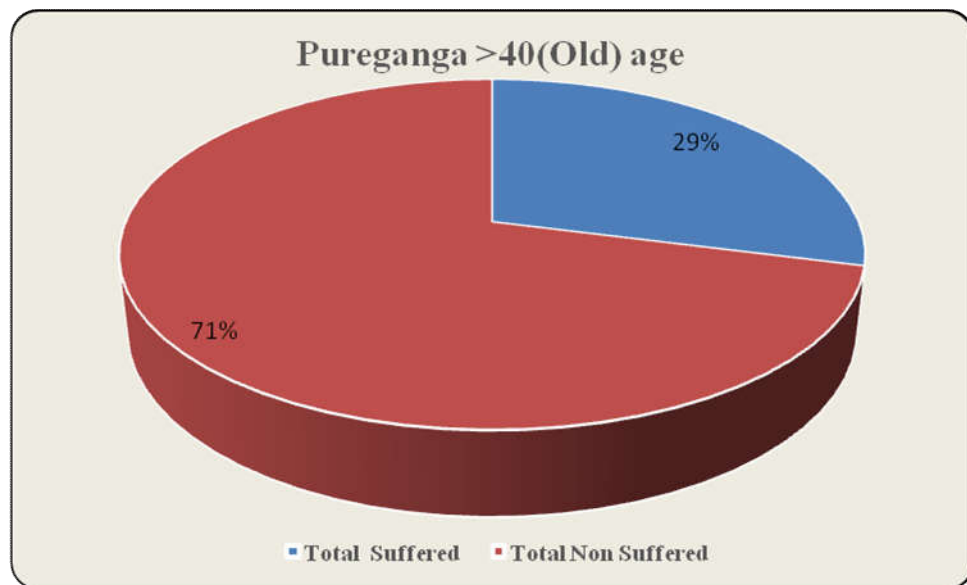

Figure S9.Total suffering and non suffering people percentage for Pureganga village in <40 age group

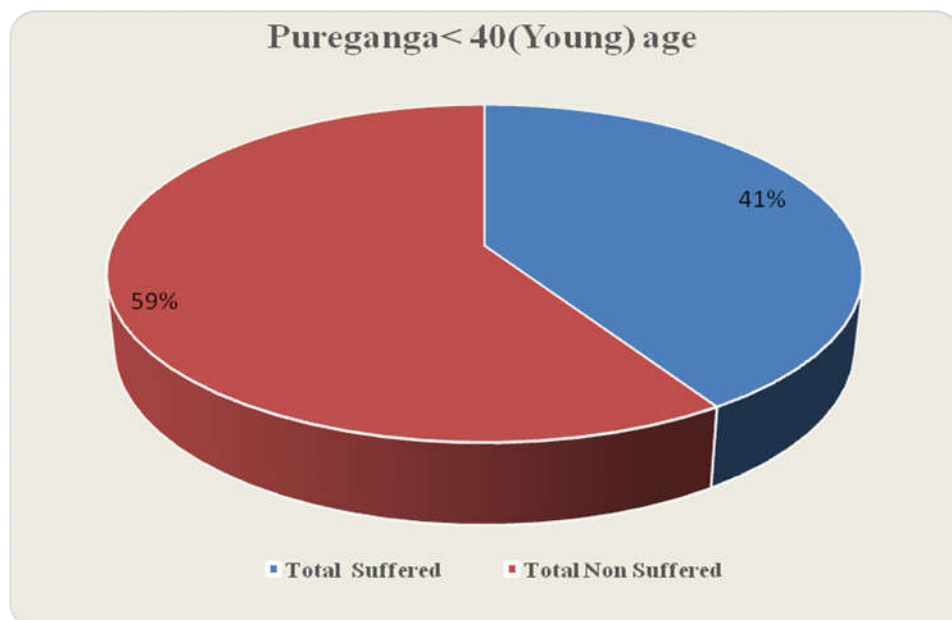

Figure S10.Total suffering and non suffering people percentage for Pureganga village in >40 age group

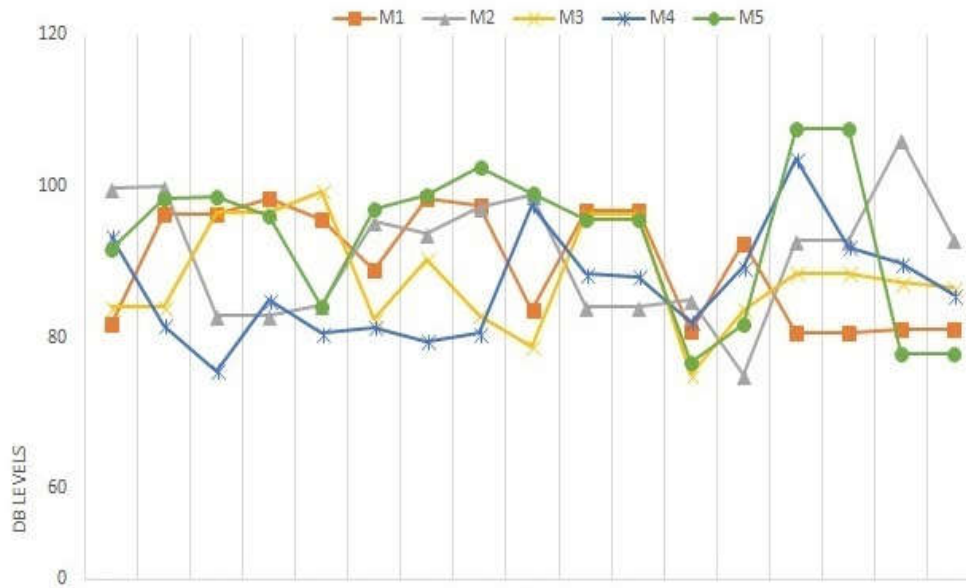

Figure S11. Variations in average noise levels over 17 road points at M1 to M5 times

Table: S6 Data Collection Schedule.

| Day       | Data sample collection Point and Time |            |            |            |            |
|-----------|---------------------------------------|------------|------------|------------|------------|
|           | M1 (7-9AM)                            | M2 (9-1PM) | M3 (1-3PM) | M4 (3-5PM) | M5 (5-7PM) |
| Monday    | 1 to 9                                | 1 to 17    | 1 to 9     | 1 to 9     | 1 to 9     |
| Tuesday   | 10 to 17                              | 1 to 17    | 10 to 17   | 10 to 17   | 10 to 17   |
| Wednesday | 1 to 9                                | 1 to 17    | 1 to 9     | 1 to 9     | 1 to 9     |
| Thursday  | 10 to 17                              | 1 to 17    | 10 to 17   | 10 to 17   | 10 to 17   |
| Friday    | 1 to 9                                | 1 to 17    | 1 to 9     | 1 to 9     | 1 to 9     |
| Saturday  | 10 to 17                              | 1 to 17    | 10 to 17   | 10 to 17   | 10 to 17   |

### Additional References:

1. Dubey, R.; Bharadwaj, S.; Sharma, V.B.; Bhatt, A.; Biswas, S. SMARTPHONE-BASED TRAFFIC NOISE MAPPING SYSTEM. *Int. Arch. Photogramm. Remote Sens. Spat. Inf. Sci.* **2022**, *XLIII-B4-2022*, 613–620, doi:10.5194/ISPRS-ARCHIVES-XLIII-B4-2022-613-2022.
2. Baliatsas, C.; van Kamp, I.; van Poll, R.; Yzermans, J. Health effects from low-frequency noise and infrasound in the general population: Is it time to listen? A systematic review of observational studies. *Sci. Total Environ.* **2016**, 557–558, 163–169, doi:10.1016/J.SCITOTENV.2016.03.065.
3. Babisch, W.; Swart, W.; Houthuijs, D.; Selander, J.; Bluhm, G.; Pershagen, G.; Dimakopoulou, K.; Haralabidis, A.S.; Katsouyanni, K.; Davou, E.; et al. Exposure modifiers of the relationships of

- transportation noise with high blood pressure and noise annoyance. *J. Acoust. Soc. Am.* **2012**, *132*, 3788–3808, doi:10.1121/1.4764881.
4. Biswas, S.; Lohani, B. Development of High-Resolution 3D Sound Propagation Model Using LIDAR Data and Air Photo. *Int. Arch. Photogramm.* 2008, 1735–1740.
  5. Tarsha-Kurdi, F.; Landes, T.; Grussenmeyer, P. Extended Ransac Algorithm for Automatic Detection of Building Roof Planes From Lidar Data. *Photogramm. J. Finl.* **2008**, *21*, 97–109.
  6. Deafness and hearing loss Available online: <https://www.who.int/news-room/fact-sheets/detail/deafness-and-hearing-loss> (accessed on Apr 3, 2022).
  7. Johnson, T.A.; Cooper, S.; Stamper, G.C.; Chertoff, M. Noise Exposure Questionnaire (NEQ): A Tool for Quantifying Annual Noise Exposure. *J. Am. Acad. Audiol.* **2017**, *28*, 14, doi:10.3766/JAAA.15070.
  8. Noise-Induced Hearing Loss (NIHL) | NIDCD Available online: <https://www.nidcd.nih.gov/health/noise-induced-hearing-loss> (accessed on Jun 10, 2022).
  9. Petri, D.; Licitra, G.; Vigotti, M.A.; Fredianelli, L. Effects of Exposure to Road, Railway, Airport and Recreational Noise on Blood Pressure and Hypertension. *Int. J. Environ. Res. Public Heal.* **2021**, *Vol. 18*, Page 9145 **2021**, *18*, 9145, doi:10.3390/IJERPH18179145.
  10. Girard, S.A.; Leroux, T.; Courteau, M.; Picard, M.; Turcotte, F.; Richer, O. Occupational noise exposure and noise-induced hearing loss are associated with work-related injuries leading to admission to hospital. *Inj. Prev.* **2015**, *21*, e88–e92, doi:10.1136/INJURYPREV-2013-040828.
  11. Plontke, S.K.R.; Dietz, K.; Pfeffer, C.; Zenner, H.P. The incidence of acoustic trauma due to New Year's firecrackers. *Eur. Arch. Oto-Rhino-Laryngology* **2002**, *259*, 247–252, doi:10.1007/S00405-002-0451-4.
  12. Sonker, M.; Bajpai, S.; Khan, M.A.; Yu, X.; Tiwary, S.K.; Shreyash, N. Review of Recent Advances and Their Improvement in the Effectiveness of Hydrogel-Based Targeted Drug Delivery: A Hope for Treating Cancer. *ACS Appl. bio Mater.* **2021**, *4*, 8080–8109, doi:10.1021/ACSABM.1C00857.
  13. Masterson, E.A.; Bushnell, P.T.; Themann, C.L.; Morata, T.C. Hearing Impairment Among Noise-Exposed Workers — United States, 2003–2012. *MMWR. Morb. Mortal. Wkly. Rep.* **2016**, *65*, 389–394, doi:10.15585/MMWR.MM6515A2.
  14. Terefenko, P.; Wziatek, D.Z.; Dalyot, S.; Boski, T.; Lima-Filho, F.P. A high-precision LiDAR-based method for surveying and classifying coastal notches. *ISPRS Int. J. Geo-Information* **2018**, *7*, doi:10.3390/ijgi7080295.
  15. WHO Burden of disease from Burden of disease from. **2011**, 126.
  16. D'Alessandro, F.; Asdrubali, F.; Schiavoni, S. The Noise Abatement Plan of an Italian Road Network: A Comparison Between Standard and Innovative Methodologies. *Open Transp. J.* **2014**, *8*, 26–38, doi:10.2174/1874447801408010026.
  17. Sun, X.; Sun, X. Occupational Noise Exposure and Worker's Health in China. *China CDC Weekly*, **2021**, *Vol. 3, Issue 18, Pages 375-377* **2021**, *3*, 375–377, doi:10.46234/CCDCW2021.102.
  18. Masterson, E.A.; Deddens, J.A.; Themann, C.L.; Bertke, S.; Calvert, G.M. Trends in worker hearing loss by industry sector, 1981–2010. *Am. J. Ind. Med.* **2015**, *58*, 392–401, doi:10.1002/AJIM.22429.
  19. Ryan, A.F.; Kujawa, S.G.; Hammill, T.; Le Prell, C.; Kil, J. Temporary and Permanent Noise-induced Threshold Shifts: A Review of Basic and Clinical Observations. *Otol. Neurotol.* **2016**, *37*, e271–e275, doi:10.1097/MAO.0000000000001071.

20. Praticò, F.G. On the dependence of acoustic performance on pavement characteristics. *Transp. Res. Part D Transp. Environ.* **2014**, *29*, 79–87, doi:10.1016/J.TRD.2014.04.004.
21. Musiba, Z. The prevalence of noise-induced hearing loss among Tanzanian miners. *Occup. Med. (Chic. Ill)*. **2015**, *65*, 386–390, doi:10.1093/OCCMED/KQV046.
22. Van Kamp, I.; Davies, H. Noise and health in vulnerable groups: A review. *Noise Heal.* **2013**, *15*, 153–159, doi:10.4103/1463-1741.112361.
23. Chen, K.H.; Su, S. Bin; Chen, K.T. An overview of occupational noise-induced hearing loss among workers: epidemiology, pathogenesis, and preventive measures. *Environ. Health Prev. Med.* **2020**, *25*, doi:10.1186/S12199-020-00906-0.
24. Yang, C.; Huang, K.; Li, Y.; Wang, J.; Zhou, M. Review for Development of Hydraulic Excavator Attachment. *Energy Sci. Technol.* **2012**, *3*, 93–97, doi:10.3968/j.est.1923847920120302.386.
25. Themann, C.L.; Masterson, E.A. Occupational noise exposure: A review of its effects, epidemiology, and impact with recommendations for reducing its burden. *J. Acoust. Soc. Am.* **2019**, *146*, 3879–3905, doi:10.1121/1.5134465.
26. Saskatchewan workers compensation board [www.wcbsask.com](http://www.wcbsask.com)
27. Suzanne, C Purdy.; Warwick, Williams.; “Development of the Noise at Work Questionnaire to assess perceptions of noise in the workplace” The journal of occupational health and safety Australia and New Zealand, vol. 18:77-83, 2002.
28. Adventist health audiology services, Portland. <https://www.adventisthealth.org>
29. National Institute for Occupational Safety and Health. (1998). Criteria for a Recommended Standard. Occupational Noise Exposure Revised Criteria 1998. Cincinnati, Ohio: U.S. Department of Health and Human Services (NIOSH) Publication No. 98-126.
30. Nasim, Alnuman; Talha, Ghnimat. “Awareness of Noise-Induced Hearing Loss and Use of Hearing Protection among Young Adults in Jordan”. *Int. J. Environ. Res. Public Health* **2019**, *16*, 2961; doi: 10.3390/ijerph16162961
31. Tiffany A. Johnson; Susan Cooper; Greta C. Stamper; Mark Chertoff. Noise Exposure Questionnaire (NEQ): A Tool for Quantifying Annual Noise Exposure. *J Am Acad Audiol*. Doi: 10.3766/jaaa.15070
